# Supplementary material
Source: publisher site journal article supplement (https://mbmg.pensoft.net/article/67533/download/suppl/36/)
Supplement: Supplementary file 1

**Wet grinding of invertebrate bulk samples – a scalable and cost-efficient protocol for metabarcoding and metagenomics**

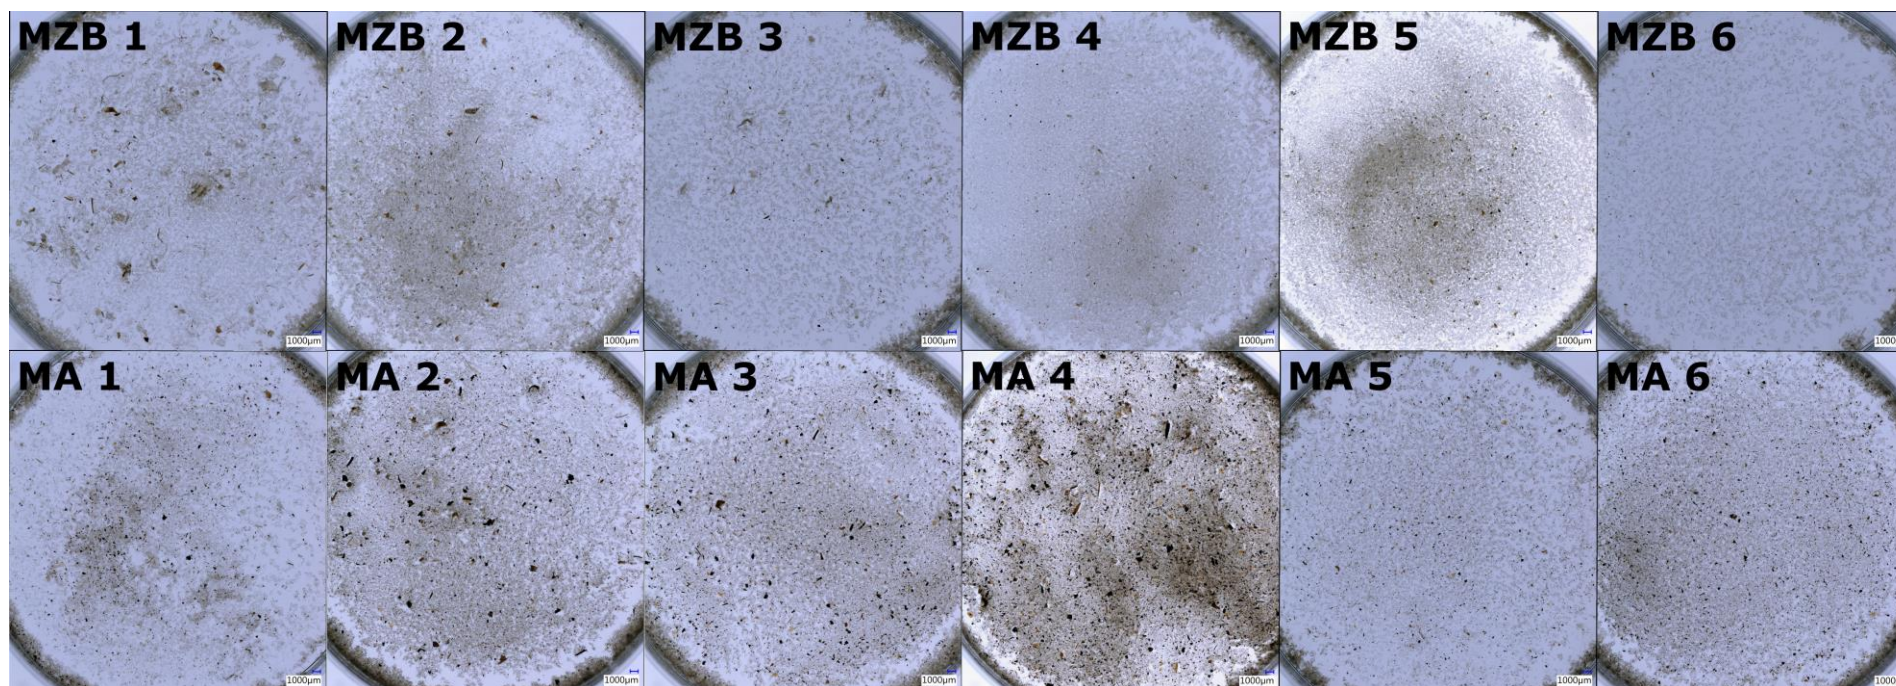

**Supplementary Figure 1:** Pictures were taken with a digital microscope (Keyence VHX-6000, Keyence, Osaka, Japan). **Top row:** Kicknet samples. **Bottom row:** Malaise trap samples.
